# Supplementary material for: Photolysis of CH3C(O)CH3 (248 nm, 266 nm), CH3C(O)C2H5 (248 nm) and CH3C(O)Br (248 nm): pressure dependent quantum yields of CH3 formation
Source: Royal Society of Chemistry journal article supplement (doi:10.1039/b701382e), 2007-01-01
Supplement: b701382e.pdf [file b701382e.pdf]

## SUPPLEMENTARY INFORMATION

**Table S1: Pressure dependent quantum yields of CH<sub>3</sub> formation and [CH<sub>3</sub>CO]/[CH<sub>3</sub>] ratios from acetone photolysis at 248 nm. The data are plotted in Figure 5.**

| Pressure / Torr N <sub>2</sub> | $\Phi_{AC}^{248}(CH_3)$ | [CH <sub>3</sub> CO] / [CH <sub>3</sub> ] |
|--------------------------------|-------------------------|-------------------------------------------|
| 5.7                            | 1.44 ± 0.09             | 0.31 ± 0.10                               |
| 16                             | 1.41 ± 0.06             | 0.40 ± 0.07                               |
| 31                             | 1.42 ± 0.07             | 0.33 ± 0.07                               |
| 53                             | 1.37 ± 0.06             | 0.38 ± 0.08                               |
| 60                             | 1.37 ± 0.09             | 0.43 ± 0.10                               |
| 75                             | 1.30 ± 0.05             | 0.39 ± 0.06                               |
| 97                             | 1.35 ± 0.04             | 0.44 ± 0.04                               |
| 122                            | 1.33 ± 0.04             | 0.37 ± 0.05                               |
| 148                            | 1.31 ± 0.07             | 0.40 ± 0.09                               |
| 182                            | 1.32 ± 0.08             | 0.42 ± 0.13                               |
| 204                            | 1.32 ± 0.10             | 0.41 ± 0.10                               |
| 255                            | 1.20 ± 0.09             | 0.50 ± 0.12                               |
| 279                            | 1.25 ± 0.10             | 0.54 ± 0.14                               |
| 302                            | 1.29 ± 0.10             | 0.48 ± 0.12                               |
| 348                            | 1.20 ± 0.09             | 0.49 ± 0.12                               |
| 379                            | 1.28 ± 0.07             | 0.46 ± 0.09                               |
| 400                            | 1.20 ± 0.06             | 0.52 ± 0.07                               |
| 418                            | 1.25 ± 0.13             | 0.51 ± 0.15                               |
| 453                            | 1.07 ± 0.08             | 0.52 ± 0.12                               |
| 472                            | 1.16 ± 0.06             | 0.59 ± 0.09                               |
| 502                            | 1.12 ± 0.06             | 0.61 ± 0.09                               |
| 546                            | 1.14 ± 0.06             | 0.52 ± 0.09                               |
| 601                            | 1.11 ± 0.04             | 0.59 ± 0.06                               |
| 625                            | 1.10 ± 0.08             | 0.52 ± 0.12                               |
| 654                            | 1.12 ± 0.05             | 0.58 ± 0.07                               |
| 699                            | 1.10 ± 0.09             | 0.69 ± 0.17                               |
| 733                            | 1.14 ± 0.06             | 0.56 ± 0.07                               |
| 794                            | 1.11 ± 0.09             | 0.58 ± 0.17                               |
| 902                            | 1.08 ± 0.05             | 0.76 ± 0.10                               |
| 1004                           | 1.04 ± 0.09             | 0.66 ± 0.17                               |
| 1065                           | 1.07 ± 0.08             | 0.71 ± 0.17                               |
| 1194                           | 0.99 ± 0.09             | 0.91 ± 0.22                               |
| 1296                           | 1.00 ± 0.08             | 0.80 ± 0.18                               |
| 1409                           | 1.05 ± 0.09             | 0.76 ± 0.19                               |
| 1543                           | 0.99 ± 0.10             | 0.76 ± 0.13                               |

*Notes:* Errors are 2  $\sigma$  (statistical) as described in the text.

**Table S2: The pressure dependence of the yield of CH<sub>3</sub> and the [CH<sub>3</sub>CO] / [CH<sub>3</sub>] ratio from CH<sub>3</sub>C(O)CH<sub>3</sub> photolysis at 266 nm The data are plotted in Figure 6.**

| Pressure / Torr N <sub>2</sub> | $\Phi_{AC}^{266}(\text{CH}_3)$ | [CH <sub>3</sub> CO] / [CH <sub>3</sub> ] |
|--------------------------------|--------------------------------|-------------------------------------------|
| 64                             | 0.94 ± 0.08                    | 1.29 ± 0.13                               |
| 64                             | 0.92 ± 0.09                    | 1.21 ± 0.15                               |
| 65                             | 1.01 ± 0.09                    | 1.18 ± 0.12                               |
| 96                             | 0.94 ± 0.10                    | 1.04 ± 0.15                               |
| 200                            | 0.97 ± 0.07                    | 1.14 ± 0.08                               |
| 306                            | 0.96 ± 0.07                    | 1.22 ± 0.08                               |
| 403                            | 0.92 ± 0.06                    | 1.28 ± 0.08                               |
| 499                            | 0.93 ± 0.08                    | 1.03 ± 0.11                               |
| 601                            | 0.96 ± 0.16                    | 1.20 ± 0.30                               |
| 601                            | 0.88 ± 0.08                    | 1.17 ± 0.13                               |
| 700                            | 0.92 ± 0.04                    | 1.11 ± 0.08                               |
| 760                            | 0.91 ± 0.04                    | 1.24 ± 0.08                               |

*Notes:* Errors are 2  $\sigma$  (statistical) as described in the text.

**Table S3: Pressure dependent quantum yields of CH<sub>3</sub> formation  
CH<sub>3</sub>C(O)Br photolysis at 248 nm. The data are plotted  
in Figure 7.**

| Pressure<br>/ Torr N <sub>2</sub> | $\Phi_{\text{CH}_3\text{COBr}}^{248}(\text{CH}_3)$ |
|-----------------------------------|----------------------------------------------------|
| 51                                | 0.92                                               |
| 95                                | 0.94                                               |
| 200                               | 0.86                                               |
| 300                               | 0.96                                               |
| 400                               | 0.93 ± 0.1                                         |
| 500                               | 0.95                                               |
| 600                               | 0.90                                               |
| 699                               | 0.90                                               |
| 800                               | 0.93                                               |
| 903                               | 0.90                                               |
| 1007                              | 1.00 ± 0.1                                         |
| 1090                              | 0.81                                               |
| 1229                              | 0.90                                               |

*Notes:* Errors are 2  $\sigma$  (statistical) and are reported only for the two pressures at which back-to back experiments with CH<sub>3</sub>I photolysis were conducted.

**Table S4: Pressure dependent quantum yields of CH<sub>3</sub> formation and [CH<sub>3</sub>CO]/[CH<sub>3</sub>] ratios from methyl ethyl ketone photolysis at 248 nm. The data are plotted in Figure 8.**

| Pressure / Torr N <sub>2</sub> | $\Phi_{\text{MEK}}^{248}(\text{CH}_3)$ | [CH <sub>3</sub> CO] / [CH <sub>3</sub> ] |
|--------------------------------|----------------------------------------|-------------------------------------------|
| 6.85                           | 0.48 ± 0.10                            | 1.13 ± 0.36                               |
| 7.10                           | 0.45 ± 0.06                            | 1.06 ± 0.19                               |
| 7.50                           | 0.50 ± 0.09                            | 1.04 ± 0.27                               |
| 17.80                          | 0.39 ± 0.06                            | 1.34 ± 0.21                               |
| 18.60                          | 0.42 ± 0.05                            | 1.42 ± 0.17                               |
| 51.00                          | 0.41 ± 0.06                            | 1.21 ± 0.19                               |
| 52.00                          | 0.39 ± 0.05                            | 1.36 ± 0.17                               |
| 99.90                          | 0.35 ± 0.05                            | 1.52 ± 0.21                               |
| 150.5                          | 0.36 ± 0.04                            | 1.53 ± 0.17                               |
| 200.0                          | 0.32 ± 0.04                            | 1.72 ± 0.21                               |
| 200.4                          | 0.35 ± 0.06                            | 1.54 ± 0.28                               |
| 250.0                          | 0.29 ± 0.04                            | 1.99 ± 0.25                               |
| 300.7                          | 0.27 ± 0.04                            | 2.30 ± 0.22                               |
| 355.4                          | 0.29 ± 0.04                            | 2.07 ± 0.20                               |
| 400.3                          | 0.24 ± 0.04                            | 2.61 ± 0.27                               |
| 525.1                          | 0.24 ± 0.05                            | 2.88 ± 0.40                               |
| 604.5                          | 0.22 ± 0.03                            | 3.09 ± 0.28                               |
| 704.9                          | 0.20 ± 0.03                            | 3.63 ± 0.29                               |
| 755.8                          | 0.23 ± 0.04                            | 3.33 ± 0.31                               |
| 1250                           | 0.19 ± 0.03                            | 4.04 ± 0.28                               |
| 1402                           | 0.19 ± 0.03                            | 4.54 ± 0.32                               |
| 1493                           | 0.19 ± 0.03                            | 4.92 ± 0.29                               |

Notes: Errors are 2  $\sigma$  (statistical) as described in the text.

**Table S5: Absorption cross sections of CH<sub>3</sub>C(O)Br at 298 K**

| $\lambda$ /nm | $\sigma^*$ | $\lambda$ /nm | $\sigma^*$ | $\lambda$ /nm | $\sigma^*$ |
|---------------|------------|---------------|------------|---------------|------------|
| 210           | 42.5       | 242           | 23.0       | 274           | 12.7       |
| 212           | 47.8       | 244           | 23.5       | 276           | 11.0       |
| 214           | 51.2       | 246           | 23.9       | 278           | 9.33       |
| 216           | 51.1       | 248           | 24.3       | 280           | 7.80       |
| 218           | 47.6       | 250           | 24.6       | 282           | 6.42       |
| 220           | 42.4       | 252           | 24.8       | 284           | 5.18       |
| 222           | 37.0       | 254           | 24.8       | 286           | 4.08       |
| 224           | 32.3       | 256           | 24.6       | 288           | 3.16       |
| 226           | 28.8       | 258           | 24.2       | 290           | 2.38       |
| 228           | 26.2       | 260           | 23.4       | 292           | 1.75       |
| 230           | 24.4       | 262           | 22.4       | 294           | 1.26       |
| 232           | 23.2       | 264           | 21.1       | 296           | 0.868      |
| 234           | 22.5       | 266           | 19.6       | 298           | 0.578      |
| 236           | 22.3       | 268           | 18.0       | 300           | 0.371      |
| 238           | 22.4       | 270           | 16.2       | 302           | 0.223      |
| 240           | 22.7       | 272           | 14.5       | 304           | 0.124      |

Notes: \*Units of  $10^{-20}$  cm<sup>2</sup> molecule<sup>-1</sup>
